# Supplementary material
Source: Springer Nature journal article supplement (https://www.springermedizin.de/resource/supplementary/12903_2013_344_MOESM2_ESM.pdf/9516944)

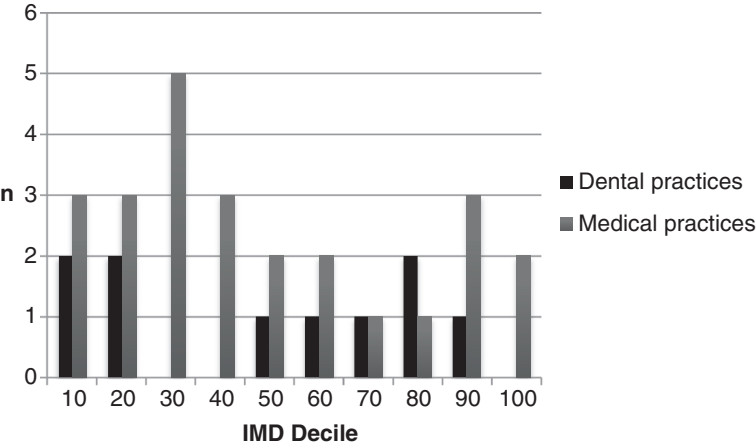

Supplement: MOESM2 [file 9516944]
